# Supplementary material
Source: PubMed Central journal article supplement (PMC6440745)
Supplement: jamaoncol-4-1683-s001.pdf [file jamaoncol-4-1683-s001.pdf]

## Supplementary Online Content

Simon TG, Ma Y, Ludvigsson JF, et al. Association between aspirin use and risk of hepatocellular carcinoma. *JAMA Oncol*. Published online October 4, 2018.

doi:10.1001/jamaoncol.2018.4154

**eMethods.** Ascertainment of Covariates in the Nurses' Health Study (NHS) and the Health Professionals Follow-up Study (HPFS) and Construction of Multivariable Models

**eTable 1.** Age-Standardized Characteristics of Study Participants from NHS and HPFS Cohorts in 1996 (n=133,371)

**eTable 2.** Stratified Analyses: Regular Aspirin Use and Risk of Hepatocellular Carcinoma in the Pooled Study Population (n=133,371)

**eTable 3.** Duration of Aspirin Use and Risk of Hepatocellular Carcinoma in Women (1980-2012) and Men (1986-2012) in the Pooled NHS and HPFS cohorts (n=133,371)

**eTable 4.** Time Since Discontinuation of Aspirin and Risk of Incident Hepatocellular Carcinoma (HCC) in the Pooled NHS and HPFS Cohorts (n=133,371)

**eTable 5.** Joint Analysis of Aspirin Dose and Duration of Use and Risk of Incident HCC in the Pooled NHS and HPFS Population (n=133,371)

**eTable 6.** Regular Use of Non-Aspirin Nonsteroidal Anti-Inflammatory Drugs (NSAIDs) or Acetaminophen and Risk of Hepatocellular Carcinoma (HCC) in the Pooled NHS and HPFS Cohorts (n=133,371)

This supplementary material has been provided by the authors to give readers additional information about their work.

**eMethods.** Ascertainment of Covariates in the Nurses' Health Study (NHS) and the Health Professionals Follow-up Study (HPFS) and Construction of Multivariable Models

*Ascertainment of covariates*

In both the NHS and HPFS cohorts, information on age, height, weight, smoking status, alcohol intake, personal and family medical history was collected at baseline and updated biennially. A validated semi-quantitative food frequency questionnaire (SFFQ) was added beginning in 1980, to assess the intake of foods and specific nutrients, as previously described in detail<sup>1-3</sup>. Self-reported diabetes prompted the mailing of a supplementary questionnaire that queried diagnosis date, diagnostic testing and symptoms, and the validity of this supplementary questionnaire has been previously confirmed in both cohorts, with accuracy exceeding 97%<sup>4,5</sup>. Diabetes diagnosed before 1988 was defined according to the National Diabetes Data Group criteria<sup>6</sup>, and using the American Diabetes Association criteria for cases identified after 1998<sup>7</sup>. Body mass index (BMI) was computed from each questionnaire using weight in kilograms divided by height in square meters. Leisure time physical activity was first assessed in 1986 and was updated biennially, expressed as the average number of metabolic equivalent-hours (MET-hours) expended per week. Information regarding physician-diagnosed hypercholesterolemia and hypertension was collected at baseline and updated on each biennial questionnaire.

### *Construction of Multivariable Models*

Consistent with our prior publication from the NHS and HPFS cohorts<sup>8</sup>, our fully-adjusted multivariable model included covariates selected a priori for their established or putative associations with aspirin use and HCC risk<sup>9-15</sup>. Our main multivariable model (model 2) was adjusted for sex (in the pooled cohort), race (white, non-white), type 2 diabetes (yes, no), regular use of oral antidiabetic medication (yes, no), dyslipidemia (yes, no), hypertension (yes, no), smoking status (current, former, never), body mass index (BMI; continuous kg/m<sup>2</sup>), alcohol intake (none, 1-14g/day, ≥15g/day), physical activity (continuous metabolic equivalent [MET]-hours/week), regular use of multivitamins (yes, no) and statins (yes, no). A third model (model 3) further accounted for regular nonaspirin NSAID use (yes, no). Because dietary factors related to a healthy lifestyle may be associated with both aspirin use and HCC risk, we constructed a fourth multivariable model that further adjusted for diet quality (continuous Alternative Healthy Eating Index [AHEI] 2010<sup>3</sup>, excluding alcohol) as well as cumulative average consumption of coffee<sup>16</sup>.

All covariates were updated biennially and included as time-varying covariates, as appropriate. Dietary factors were ascertained from validated semi-quantitative food frequency questionnaires (SFFQ), as previously described in detail<sup>1-3</sup>. Consistent with prior analyses of these cohorts<sup>3, 17</sup>, we used cumulative average values for dietary factors, physical activity and alcohol, to minimize variance and to better reflect long-term patterns.

### *Statistical power for analysis of acetaminophen:*

Based on the sample size of 133,371 participants in the NHS and HPFS populations in 1996 (the mid-point of study follow-up), among whom 38,521 were acetaminophen users, as well as the number of cases of incident HCC over study follow-up, we had greater than 80% power to detect a hazard ratio (HR) of 0.65 comparing acetaminophen users with non-users<sup>18</sup>.

**eTable 1.** Age-Standardized Characteristics of Study Participants from NHS and HPFS Cohorts in 1996 (n=133,371)

| Characteristics <sup>1</sup>                      | Non-Regular Use <sup>2</sup><br>(N=74,516) | Regular Aspirin Use <sup>2</sup><br>(N=58,855) |
|---------------------------------------------------|--------------------------------------------|------------------------------------------------|
| Women, %                                          | 68                                         | 62                                             |
| Age, years, SD                                    | 62 (8)                                     | 64 (8)                                         |
| White race, %                                     | 97                                         | 98                                             |
| Body mass index (BMI), kg/m <sup>2</sup> , SD     | 24.4 (4.4)                                 | 24.9 (4.2)                                     |
| Obesity <sup>‡</sup> , %                          | 10                                         | 10                                             |
| Hypertension, %                                   | 26                                         | 37                                             |
| Dyslipidemia, %                                   | 33                                         | 44                                             |
| Type 2 diabetes, %                                | 6                                          | 8                                              |
| Smoking status, %                                 |                                            |                                                |
| • Current                                         | 12                                         | 11                                             |
| • Former                                          | 42                                         | 45                                             |
| • Never                                           | 47                                         | 44                                             |
| Physical activity, MET-hours/week, median [IQR]   | 12 [22]                                    | 13 [25]                                        |
| Alcohol intake, grams/day, median [IQR]           | 2 [6]                                      | 2 [9]                                          |
| Oral antidiabetic medication use <sup>3</sup> , % | 6                                          | 6                                              |
| Statin medication use <sup>4</sup> , %            | 6                                          | 12                                             |
| Multivitamin use <sup>4</sup> , %                 | 44                                         | 54                                             |
| Non-aspirin NSAID use <sup>4</sup> , %            | 22                                         | 19                                             |
| Acetaminophen use <sup>4</sup> , %                | 28                                         | 30                                             |

Abbreviations: BMI, body mass index; NHS, Nurses' Health Study; HPFS, Health Professionals Follow-up Study; MET, metabolic equivalents; IQR, interquartile range; SD, standard deviation; NSAID, non-steroidal anti-inflammatory drug

<sup>1</sup> All data reported as percentage (%) or mean±standard deviation (SD), unless noted otherwise. Except for mean of age, all data were age-standardized to the age distribution of participants.

<sup>2</sup> Regular use of aspirin was defined as consumption of at least 2 or more standard tablets per week of that medication, and modeled as a time-varying covariate. Non-regular use was defined as consumption of <2 standard tablets/week.

<sup>3</sup> Oral antidiabetic medication use included any hypoglycemic medications taken by mouth, and did not distinguish by individual medication type.

<sup>4</sup> Regular use of multivitamins, NSAIDs, acetaminophen and statins was defined as consumption of at least 2 or more tablets of the medication of interest per week (vs. non-regular use).

<sup>‡</sup>Obesity defined as BMI ≥30kg/m<sup>2</sup>.

**eTable 2.** Stratified Analyses: Regular Aspirin Use\* and Risk of Hepatocellular Carcinoma in the Pooled Study Population (n=133,371)

| Variable                              | No. of HCC Cases <sup>1</sup> | Multivariable-adjusted HR (95% CI) |                  | P-interaction |
|---------------------------------------|-------------------------------|------------------------------------|------------------|---------------|
|                                       |                               | Regular aspirin use*               |                  |               |
|                                       |                               | No (Ref.)                          | Yes              |               |
| Age, years                            |                               |                                    |                  |               |
| • ≤ 65                                | 20                            | 1                                  | 0.61 (0.22-1.71) | 0.29          |
| • > 65                                | 88                            | 1                                  | 0.50 (0.32-0.78) |               |
| Cohort                                |                               |                                    |                  |               |
| • HPFS                                | 43                            | 1                                  | 0.54 (0.29-1.03) | 0.92          |
| • NHS                                 | 65                            | 1                                  | 0.51 (0.30-0.87) |               |
| Obesity (BMI > 25 kg/m <sup>2</sup> ) |                               |                                    |                  |               |
| • No                                  | 67                            | 1                                  | 0.39 (0.22-0.69) | 0.39          |
| • Yes                                 | 41                            | 1                                  | 0.74 (0.39-1.42) |               |
| Smoking status                        |                               |                                    |                  |               |
| • Never                               | 36                            | 1                                  | 0.40 (0.19-0.86) | 0.15          |
| • Ever                                | 72                            | 1                                  | 0.58 (0.36-0.96) |               |
| Alcohol intake, grams / day           |                               |                                    |                  |               |
| • < 2 grams                           | 73                            | 1                                  | 0.48 (0.29-0.80) | 0.25          |
| • ≥ 2 grams                           | 35                            | 1                                  | 0.62 (0.30-1.26) |               |
| Type 2 diabetes                       |                               |                                    |                  |               |
| • No                                  | 72                            | 1                                  | 0.48 (0.28-0.80) | 0.45          |
| • Yes                                 | 36                            | 1                                  | 0.56 (0.28-1.12) |               |
| Hypertension                          |                               |                                    |                  |               |
| • No                                  | 57                            | 1                                  | 0.44 (0.24-0.82) | 0.33          |
| • Yes                                 | 51                            | 1                                  | 0.61 (0.34-1.07) |               |
| Dyslipidemia                          |                               |                                    |                  |               |
| • No                                  | 69                            | 1                                  | 0.47 (0.27-0.81) | 0.38          |
| • Yes                                 | 39                            | 1                                  | 0.64 (0.33-1.21) |               |

Abbreviations: HCC, hepatocellular carcinoma; HR, hazard ratio; CI, confidence interval; HPFS, Health Professionals' Follow-up Study; NHS, Nurses' Health Study; BMI, body mass index; Ref., reference

<sup>1</sup>Number of cases of hepatocellular carcinoma (HCC), recorded in each strata

\*Regular aspirin use defined as self-reported use of aspirin at least 2 or more times per week, updated with each biennial questionnaire (vs. non-use).

**eTable 3.** Duration of Aspirin Use\* and Risk of Hepatocellular Carcinoma in Women (1980-2012) and Men (1986-2012) in the Pooled NHS and HPFS cohorts (n=133,371)

|                                    | Duration of Aspirin Use*, years |                  |                  |                  | P <sub>trend</sub> <sup>1</sup> |
|------------------------------------|---------------------------------|------------------|------------------|------------------|---------------------------------|
|                                    | Never-use<br>(Ref.)             | < 5 years        | 5 to < 10 years  | ≥ 10 years       |                                 |
| Cases / Person-Years               | 38 / 1,510,602                  | 23 / 816,080     | 16 / 627,575     | 31 / 1,277,931   | --                              |
| Model 1 <sup>∂</sup> , HR (95% CI) | 1                               | 0.83 (0.49-1.41) | 0.60 (0.33-1.09) | 0.51 (0.31-0.85) | 0.037                           |
| Model 2 <sup>‡</sup> , HR (95% CI) | 1                               | 0.87 (0.51-1.48) | 0.59 (0.33-1.08) | 0.51 (0.30-0.86) | 0.031                           |
| Model 3 <sup>§</sup> , HR (95% CI) | 1                               | 0.90 (0.53-1.52) | 0.62 (0.34-1.13) | 0.55 (0.32-0.93) | 0.033                           |

Abbreviations: NHS, Nurses' Health Study; HPFS, Health Professionals Follow-up Study; PY, person-years; HR, Hazard Ratio; CI, confidence interval; Ref., reference

\*Categories of aspirin use duration were compared to individuals reporting never-use of aspirin (reference group).

<sup>∂</sup> Model 1 was conditioned on age (continuous years) and year of questionnaire return and sex/cohort.

<sup>‡</sup> Model 2 = Model 1 + race (white vs. non-white), body mass index (continuous kg/m<sup>2</sup>), alcohol intake (0-4.9, 5-14.9, ≥15 g/day), smoking status (current vs. prior vs. never), physical activity (<3, 3 to 8.9, ≥ 9 MET-hours/week), diabetes (yes vs. no), hypertension (yes vs. no), dyslipidemia (yes vs. no), regular multivitamin use (≥2 multivitamin tablets per week vs. no), regular use of oral antidiabetic medications (yes vs. no) and regular use of statins (yes vs. no). All relevant covariates were updated over time.

<sup>§</sup> Model 3 = Model 2 + regular use of non-aspirin nonsteroidal anti-inflammatory drugs (NSAID; ≥2 tablets per week vs. no), assessed as a time-varying covariate.

<sup>1</sup> P-trend calculated using continuous duration of aspirin use (months) among aspirin users, compared to the lowest reported duration of use.

**eTable 4.** Time Since Discontinuation of Aspirin\* and Risk of Incident Hepatocellular Carcinoma (HCC) in the Pooled NHS and HPFS Cohorts (n=133,371)

|                                                 | Current aspirin use | Discontinued < 8 years | Discontinued ≥ 8 years | Never aspirin use | P <sub>trend</sub> <sup>1</sup> |
|-------------------------------------------------|---------------------|------------------------|------------------------|-------------------|---------------------------------|
| Cases / Person-Years                            | 32 / 1,873,462      | 12 / 321,405           | 29 / 917,564           | 35 / 1,119,758    | --                              |
| Model 1 <sup>∅</sup> , HR <sup>2</sup> (95% CI) | 1 (Ref.)            | 1.33 (0.61-2.91)       | 1.66 (0.99-2.78)       | 2.25 (1.37-3.68)  | 0.003                           |
| Model 2 <sup>‡</sup> , HR (95% CI)              | 1                   | 1.30 (0.59-2.85)       | 1.77 (1.06-2.97)       | 2.16 (1.30-3.57)  | 0.006                           |
| Model 3 <sup>§</sup> , HR, 95% CI)              | 1                   | 1.36 (0.62-2.99)       | 1.86 (1.11-3.11)       | 2.07 (1.25-3.43)  | 0.009                           |

Abbreviations: HR, hazard ratio; CI, confidence interval; Ref., reference

\*Current aspirin use (reference group) was defined as consumption of ≥2 standard (325 mg) aspirin tablets per week on the most recent questionnaire. Among prior aspirin users, time since discontinuation of regular use was defined as non-regular use on the most recent questionnaire but regular aspirin use <8 or ≥8 years in the past, using methods previously described in these cohorts<sup>17-18</sup>.

<sup>2</sup>Hazard ratios (HR) are for individuals in each category compared to subjects in the reference category (never aspirin use).

<sup>1</sup>P-trend calculated using continuous elapsed time in months since last regular aspirin use, among prior aspirin users.

<sup>∅</sup> Model 1 was conditioned on age (continuous years) and year of questionnaire return and sex/cohort.

<sup>‡</sup> Model 2 = Model 1 + race (white vs. non-white), body mass index (continuous kg/m<sup>2</sup>), alcohol intake (0-4.9, 5-14.9, ≥15 g/day), smoking status (current vs. prior vs. never), physical activity (<3, 3 to 8.9, ≥ 9 MET-hours/week), diabetes (yes vs. no), hypertension (yes vs. no), dyslipidemia (yes vs. no), regular multivitamin use (≥2 multivitamin tablets per week vs. no), regular use of oral antidiabetic medications (yes vs. no) and regular use of statins (yes vs. no). All relevant covariates were updated over time.

<sup>§</sup> Model 3 = Model 2 + regular use of non-aspirin nonsteroidal anti-inflammatory drug (NSAID) use (≥2 NSAID tablets per week vs. no), which was assessed as a time-varying covariate.

**eTable 5.** Joint Analysis of Aspirin Dose and Duration of Use and Risk of Incident HCC in the Pooled NHS and HPFS Population (n=133,371)

|                                                                    | Dose*<br>(tablets/week) | Duration of Aspirin Use      |                  |                  |
|--------------------------------------------------------------------|-------------------------|------------------------------|------------------|------------------|
|                                                                    |                         | 0 years                      | >0 to <5 years   | ≥5 years         |
| <b>Cases of HCC</b><br><i>Multivariable HR<sup>‡</sup>, 95% CI</i> | <b>0</b>                | 35<br>1 ( <i>Reference</i> ) | --               | --               |
|                                                                    | <b>Up to 1.5</b>        | --                           | 11               | 13               |
|                                                                    |                         |                              | 1.05 (0.52-2.12) | 0.70 (0.37-1.30) |
|                                                                    | <b>1.5 to &lt; 5</b>    | --                           | 11               | 16               |
|                                                                    |                         |                              | 0.91 (0.47-1.76) | 0.41 (0.21-0.77) |
|                                                                    | <b>≥ 5</b>              | --                           | 15               | 7                |
|                                                                    |                         |                              | 0.71 (0.35-1.43) | 0.25 (0.11-0.58) |

Abbreviations: HCC, hepatocellular carcinoma; NHS, Nurses' Health Study; HPFS, Health Professionals Follow-up Study; PY, person-years; HR, Hazard Ratio; CI, confidence interval

\*Dose of aspirin defined by cumulative average aspirin tablets consumed per week, updated at each biennial questionnaire.

‡ Multivariable Cox proportional hazards regression model conditioned on age (years) and year of questionnaire return, with further adjustment for sex, race (white vs. non-white), body mass index (continuous kg/m<sup>2</sup>), alcohol intake (0 – 4.9 g/day, 5-14.9 g/day, ≥15 g/day), smoking status (current vs. prior vs. never), physical activity (< 3 metabolic equivalent (MET)-hours/week, 3 to 8.9 MET-hours/week, ≥ 9 MET-hours/week), diabetes (yes vs. no), hypertension (yes vs. no), dyslipidemia (yes vs. no), and regular multivitamin use (≥2 tablets per week vs. no), with all relevant covariates were updated over time.



**eTable 6.** Regular Use\* of Non-Aspirin Nonsteroidal Anti-Inflammatory Drugs (NSAIDs)<sup>1</sup> or Acetaminophen\* and Risk of Hepatocellular Carcinoma (HCC) in the Pooled NHS and HPFS Cohorts (n=133,371)

|                                 | Non-aspirin NSAIDs <sup>1</sup> |                     | Acetaminophen          |                     |
|---------------------------------|---------------------------------|---------------------|------------------------|---------------------|
|                                 | <i>Non-Regular use</i>          | <i>Regular use*</i> | <i>Non-Regular use</i> | <i>Regular use*</i> |
| Cases/Person-years              | 94 / 3,048,136                  | 14 / 1,184,052      | 69 / 2,480,708         | 39 / 1,751,481      |
| Age-adjusted HR (95%CI)         | 1 (Ref.)                        | 1.26 (0.92-1.73)    | 1 (Ref.)               | 0.76 (0.46-1.26)    |
| Model 2 <sup>‡</sup> ; (95%CI)  | 1                               | 1.11 (0.80-1.54)    | 1                      | 0.85 (0.52-1.40)    |
| Model 3 <sup>§</sup> ; (95% CI) | 1                               | 1.09 (0.78-1.51)    | 1                      | 0.89 (0.54-1.46)    |

Abbreviations: HCC, hepatocellular carcinoma; NHS, Nurses' Health Study; HPFS, Health Professionals Follow-up Study; PY, person-years; HR, Hazard Ratio; CI, confidence interval; NSAIDs, non-steroidal anti-inflammatory drugs; Ref., reference

<sup>1</sup>Nonaspirin NSAID use was a composite category, that included both ibuprofen (e.g. Advil, Motrin, etc.) and other nonaspirin NSAIDs (e.g. Aleve, Naprosyn, Relafen, Ketofen, Anaprox, etc).

\*Regular use of all medications was defined as self-reported use at least 2 or more times per week, updated at each biennial questionnaire. Non-regular use was defined as use of that medication less than 2 times per week.

<sup>‡</sup> Model 2 was conditioned on age (years) and year of questionnaire return, with further adjustment for sex, race (white vs. non-white), body mass index (continuous kg/m<sup>2</sup>), alcohol intake (0-4.9, 5-14.9, ≥15 g/day), smoking status (current vs. prior vs. never), physical activity (<3, 3 to 8.9, ≥ 9 MET-hours/week), diabetes (yes vs. no), hypertension (yes vs. no), dyslipidemia (yes vs. no), regular multivitamin use (≥2 multivitamin tablets per week vs. no), regular use of oral antidiabetic medications (yes vs. no) and regular use of statins (yes vs. no). All relevant covariates were updated over time.

<sup>§</sup> Model 3 = Model 2 + regular aspirin use, defined as use of aspirin at least 2 or more times per week. Non-regular aspirin use was defined as use of aspirin less than 2 times per week. All relevant variables were assessed as time-varying covariates.

## eReferences

1. Willett WC, Sampson L, Stampfer MJ, et al. Reproducibility and validity of a semiquantitative food frequency questionnaire. *Am J Epidemiol* 1985;122:51-65.
2. Salvini S, Hunter DJ, Sampson L, et al. Food-based validation of a dietary questionnaire: the effects of week-to-week variation in food consumption. *Int J Epidemiol* 1989;18:858-67.
3. Chiuve SE, Fung TT, Rimm EB, et al. Alternative dietary indices both strongly predict risk of chronic disease. *J Nutr* 2012;142:1009-18.
4. Hu FB, Leitzmann MF, Stampfer MJ, et al. Physical activity and television watching in relation to risk for type 2 diabetes mellitus in men. *Arch Intern Med* 2001;161:1542-8.
5. Hu FB, Li TY, Colditz GA, et al. Television watching and other sedentary behaviors in relation to risk of obesity and type 2 diabetes mellitus in women. *JAMA* 2003;289:1785-91.
6. Classification and diagnosis of diabetes mellitus and other categories of glucose intolerance. National Diabetes Data Group. *Diabetes* 1979;28:1039-57.
7. Report of the Expert Committee on the Diagnosis and Classification of Diabetes Mellitus. *Diabetes Care* 1997;20:1183-97.
8. Simon TG, King L.Y., Chong DQ et al. Diabetes, Metabolic Comorbidities and Risk of Hepatocellular Carcinoma (HCC): Results from Two Prospective Cohort Studies. *Hepatology* (Accepted; in press) 2017.
9. Singh S, Singh PP, Singh AG, et al. Statins are associated with a reduced risk of hepatocellular cancer: a systematic review and meta-analysis. *Gastroenterology* 2013;144:323-32.
10. Singh S, Singh PP, Singh AG, et al. Anti-diabetic medications and the risk of hepatocellular cancer: a systematic review and meta-analysis. *Am J Gastroenterol* 2013;108:881-91; quiz 892.
11. Zhang W, Shu XO, Li H, et al. Vitamin intake and liver cancer risk: a report from two cohort studies in China. *J Natl Cancer Inst* 2012;104:1173-81.
12. Kasmari AJ, Welch A, Liu G, et al. Independent of Cirrhosis, Hepatocellular Carcinoma Risk Is Increased with Diabetes and Metabolic Syndrome. *Am J Med* 2017;130:746 e1-746 e7.
13. Mittal S, Kramer JR, Omino R, et al. Role of Age and Race in the Risk of Hepatocellular Carcinoma in Veterans With Hepatitis B Virus Infection. *Clin Gastroenterol Hepatol* 2018;16:252-259.
14. Koh WP, Robien K, Wang R, et al. Smoking as an independent risk factor for hepatocellular carcinoma: the Singapore Chinese Health Study. *Br J Cancer* 2011;105:1430-5.
15. Campbell PT, Newton CC, Freedman ND, et al. Body Mass Index, Waist Circumference, Diabetes, and Risk of Liver Cancer for U.S. Adults. *Cancer Res* 2016;76:6076-6083.
16. Salazar-Martinez E, Willett WC, Ascherio A, et al. Coffee consumption and risk for type 2 diabetes mellitus. *Ann Intern Med* 2004;140:1-8.

17. Cao Y, Willett WC, Rimm EB, et al. Light to moderate intake of alcohol, drinking patterns, and risk of cancer: results from two prospective US cohort studies. *BMJ* 2015;351:h4238.
18. Rosner B. *Fundamentals of Biostatistics*. Pacific Grove, CA: Duxbury Thomson Learning, 2000.
